# Supplementary material
Source: PubMed Central journal article supplement (PMC7398769)
Supplement: nqaa138_supplemental_file.pdf [file nqaa138_supplemental_file.pdf]

Supplementary Table.1 Baseline characteristics of completers versus non-completers

|                                  | Completers<br>(n=76) | Non-completers<br>(n=35) | <i>p</i> <sup>1</sup> |
|----------------------------------|----------------------|--------------------------|-----------------------|
| Age (years)                      | 58 (8)               | 59 (11)                  | 0.6                   |
| Sex (F %)                        | 47.4                 | 45.7                     | 0.87                  |
| Duration of diabetes (years)     | 13.7 (8.8)           | 12.2 (7)                 | 0.34                  |
| Body weight (kg)                 | 92.8 (18)            | 94.3 (21.1)              | 0.71                  |
| BMI (kg/m <sup>2</sup> )         | 32.3 (5.7)           | 32.9 (5.7)               | 0.6                   |
| Waist circumference (cm)         | 109.8 (13.8)         | 110.3 (2.4)              | 0.88                  |
| Hip circumference (cm)           | 109.5 (12.2)         | 109.6 (2.2)              | 0.95                  |
| Waist/hip ratio                  | 1 (0.08)             | 1 (0.01)                 | 0.91                  |
| Body fat (%)                     | 36.4 (8.3)           | 37.5 (8.9)               | 0.51                  |
| <b>Lipid profile</b>             |                      |                          |                       |
| Total Cholesterol (mg/dl)        | 160 (31)             | 168 (47)                 | 0.37                  |
| HDL-C (mg/dl)                    | 47 (15)              | 46 (15)                  | 0.66                  |
| LDL-C (mg/dl)                    | 84 (25)              | 86 (32)                  | 0.71                  |
| VLDL-C ( mg/dl)                  | 26 (12)              | 30 (15)                  | 0.16                  |
| Triglycerides (mg/dl)            | 152 (104)            | 189 (229)                | 0.36                  |
| HbA1c (%)                        | 8.02 (0.95)          | 8.24 (0.98)              | 0.27                  |
| Fasting glucose (mg/dl)          | 165 (65)             | 160 (49)                 | 0.62                  |
| HOMA-IR                          | 6.85 (5.3)           | 8.4 (6.9)                | 0.24                  |
| Systolic blood pressure (mmHg)   | 130 (14)             | 132 (20)                 | 0.49                  |
| Diastolic blood pressure (mmHg)  | 71 (9)               | 72 (10)                  | 0.88                  |
| CRP (mg/L)                       | 4.7 (7.4)            | 4.6 (4.7)                | 0.91                  |
| Total daily energy intake (kcal) | 1927 (552)           | 1922 (562)               | 0.96                  |
| Energy from carbohydrate (%)     | 43.7 (7.4)           | 42.9 (6.2)               | 0.58                  |
| Energy from protein (%)          | 17.9 (3.6)           | 18.8 (3.8)               | 0.24                  |

On-line Supplementary Material

|                               |            |            |      |
|-------------------------------|------------|------------|------|
| Energy from total fat (%)     | 37.9 (5.8) | 37.8 (5.1) | 0.95 |
| Energy from saturated fat (%) | 12.8 (2.9) | 13.5 (3)   | 0.25 |

---

Data are mean (SD), or %. Abbreviations: CRP, c-reactive protein; HOMA-IR, homeostatic model assessment of insulin resistance. <sup>1</sup>Analyses were performed by linearcontrasts using the SAS Mixed Procedure (PROC MIXED).

Supplementary Table.2 Type 2 diabetes management in study groups

| Treatment n (%)       | Control group<br>(n=38) | Low-fat group<br>(n=36) | High-fat group<br>(n=37) | <i>p</i> <sup>1</sup> |
|-----------------------|-------------------------|-------------------------|--------------------------|-----------------------|
| <b>Lifestyle only</b> | 1 (2.6)                 | 0 (0)                   | 1 (2.7)                  | 0.6                   |
| <b>Oral</b>           |                         |                         |                          |                       |
| Metformin             | 26 (68.4)               | 30 (83.3)               | 28 (75.7)                | 0.3                   |
| SFUs                  | 15 (39.5)               | 15 (41.7)               | 10 (27)                  | 0.4                   |
| DPP-4 inhibitors      | 1 (2.6)                 | 2 (5.6)                 | 6 (16.2)                 | 0.08                  |
| TZDs                  | 0 (0)                   | 2 (5.6)                 | 2 (5.4)                  | 0.3                   |
| SGLT-2 inhibitors     | 8 (21)                  | 8 (22.2)                | 7 (18.9)                 | 0.9                   |
| <b>Injectable</b>     |                         |                         |                          |                       |
| GLP-1 analogues       | 8 (21)                  | 11 (30.6)               | 10 (27)                  | 0.6                   |
| Insulin <sup>2</sup>  | 12 (31.6)               | 19 (54.2)               | 13 (36.1)                | 0.06                  |

Data are n (%).

<sup>1</sup>p value calculated using Pearson's chi squared test.

<sup>2</sup>one subject in Low-fat group and one in High-fat group had missing data on insulin use. Abbreviations: SFUs, sulfonylureas; DPP, dipeptidyl peptidase; TZDs, thiazolidinediones; GLP, glucagon-like-peptide; SGLT, sodium-glucose transport proteins.
